# Supplementary material
Source: MDPI journal article supplement (https://www.mdpi.com/2076-3417/8/4/565)
Supplement: s1 [file s1]

# Supplementary Materials: Facile Fabrication of 3D Hierarchically Porous Carbon Foam as Supercapacitor Electrode Material

Yunfang Gao, Liangpo Cai, Xin Xu and Jie Ying

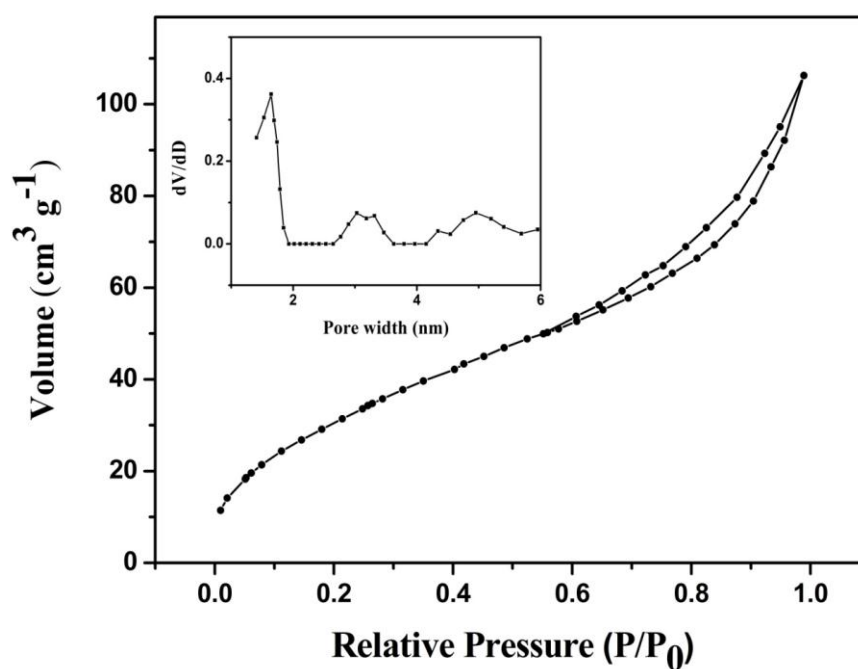

**Figure S1.** The N<sub>2</sub> adsorption/desorption isotherm of starch-derived carbon SC and the corresponding pore size distribution in the inset.

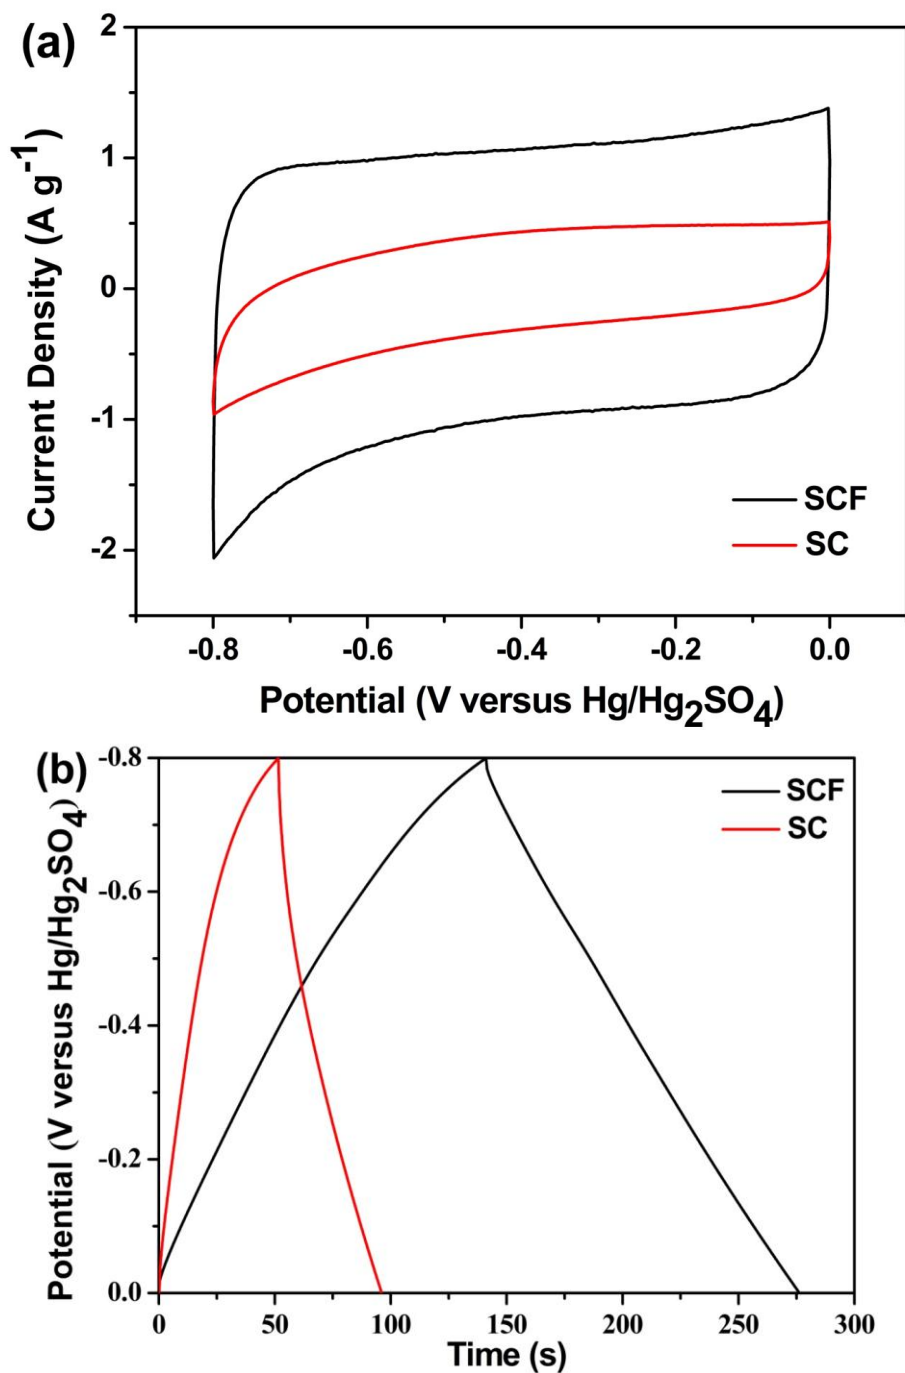

**Figure S2.** Electrochemical performances are measured in a three-electrode system using 5M  $\text{H}_2\text{SO}_4$  as the electrolyte. (a) Cyclic voltammogram CV curves of SC and starch-derived carbon foam SCF at  $10\text{mV s}^{-1}$ ; (b) Galvanostatic charge-discharge GCD curves of SC and SCF at  $0.5\text{ A g}^{-1}$ .

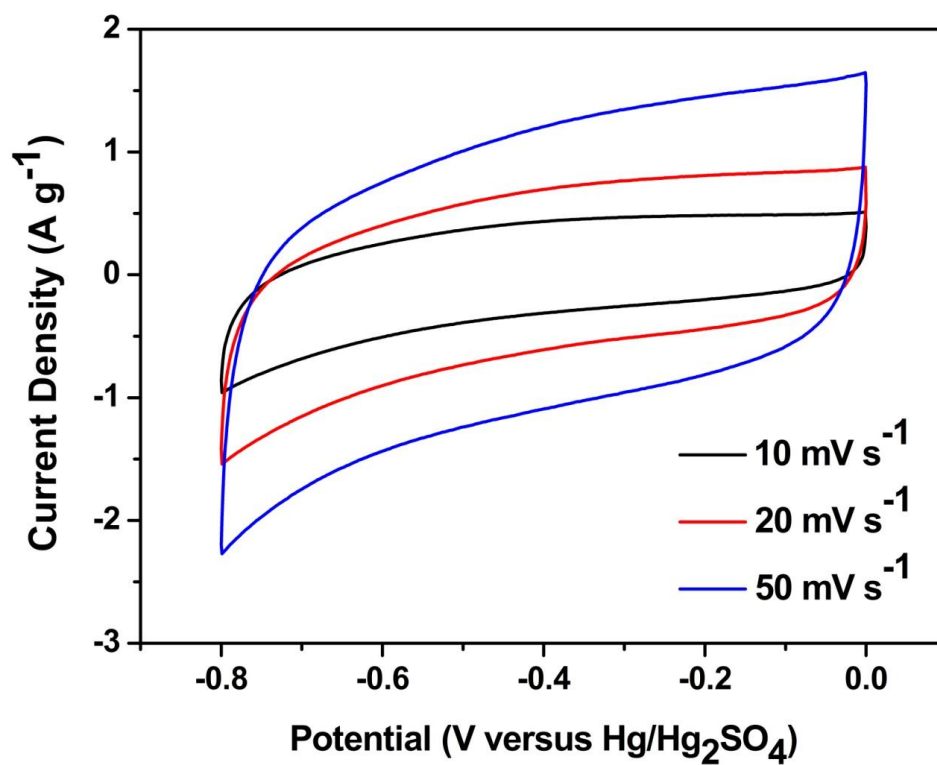

Figure S3. CV curves of SC at different scanning rates in 5M H<sub>2</sub>SO<sub>4</sub>.
